# Supplementary material for: Development and validation of a prediction model for adenoma detection during screening and surveillance colonoscopy with comparison to actual adenoma detection rates
Source: PubMed Central journal article supplement (PMC5619799; doi:10.1371/journal.pone.0185560), 2017-09-28
Supplement: pone.0185560.s004.pdf [file pone.0185560.s004.pdf]

**S1 File. Gastro-Intestinal Quality Improvement Consortium (GIQuIC) data-entry form**

|                                          |                                                                                     |
|------------------------------------------|-------------------------------------------------------------------------------------|
| <b>GI Quality Improvement Consortium</b> |  |
| <i>Colonoscopy Data Collection Form</i>  |                                                                                     |

| <b>Patient Sociodemographic Information</b> |                                                                                                                                                                                                                                                                                                                                                                                                                                                                                                                                                                                                                                                  |   |   |   |   |   |   |   |   |
|---------------------------------------------|--------------------------------------------------------------------------------------------------------------------------------------------------------------------------------------------------------------------------------------------------------------------------------------------------------------------------------------------------------------------------------------------------------------------------------------------------------------------------------------------------------------------------------------------------------------------------------------------------------------------------------------------------|---|---|---|---|---|---|---|---|
| <b>Patient Identifier:</b>                  |                                                                                                                                                                                                                                                                                                                                                                                                                                                                                                                                                                                                                                                  |   |   |   |   |   |   |   |   |
| <b>Patient Type:</b>                        | <input type="checkbox"/> Inpatient<br><input type="checkbox"/> Outpatient                                                                                                                                                                                                                                                                                                                                                                                                                                                                                                                                                                        |   |   |   |   |   |   |   |   |
| <b>Patient Zip Code:</b>                    | <table border="1" style="display: inline-table; border-collapse: collapse;"> <tr> <td style="width: 20px; height: 20px;"></td> </tr> </table>                                                                                                                                                                                                                                                                   |   |   |   |   |   |   |   |   |
|                                             |                                                                                                                                                                                                                                                                                                                                                                                                                                                                                                                                                                                                                                                  |   |   |   |   |   |   |   |   |
| <b>Patient Birth Date:</b>                  | <table border="1" style="display: inline-table; border-collapse: collapse;"> <tr> <td style="width: 20px; height: 20px; text-align: center;">m</td> <td style="width: 20px; height: 20px; text-align: center;">m</td> <td style="width: 20px; height: 20px; text-align: center;">d</td> <td style="width: 20px; height: 20px; text-align: center;">d</td> <td style="width: 20px; height: 20px; text-align: center;">y</td> </tr> </table> | m | m | d | d | y | y | y | y |
| m                                           | m                                                                                                                                                                                                                                                                                                                                                                                                                                                                                                                                                                                                                                                | d | d | y | y | y | y |   |   |
| <b>Patient Gender:</b>                      | <input type="checkbox"/> Male<br><input type="checkbox"/> Female                                                                                                                                                                                                                                                                                                                                                                                                                                                                                                                                                                                 |   |   |   |   |   |   |   |   |
| Patient Height: (inches)                    | <table border="1" style="display: inline-table; border-collapse: collapse;"> <tr> <td style="width: 20px; height: 20px;"></td> <td style="width: 20px; height: 20px;"></td> </tr> </table>                                                                                                                                                                                                                                                                                                                                                                                                                                                       |   |   |   |   |   |   |   |   |
|                                             |                                                                                                                                                                                                                                                                                                                                                                                                                                                                                                                                                                                                                                                  |   |   |   |   |   |   |   |   |
| Patient Weight: (pounds)                    | <table border="1" style="display: inline-table; border-collapse: collapse;"> <tr> <td style="width: 20px; height: 20px;"></td> </tr> </table>                                                                                                                                                                                                                                                                                                                                                             |   |   |   |   |   |   |   |   |
|                                             |                                                                                                                                                                                                                                                                                                                                                                                                                                                                                                                                                                                                                                                  |   |   |   |   |   |   |   |   |
| <b>Patient Race:</b>                        | <input type="checkbox"/> American Indian (Native American) or Alaska Native<br><input type="checkbox"/> Asian<br><input type="checkbox"/> Black or African American<br><input type="checkbox"/> Native Hawaiian or Other Pacific Islander<br><input type="checkbox"/> White<br><input type="checkbox"/> Patient declined to provide<br><input type="checkbox"/> Unknown<br><input type="checkbox"/> Other                                                                                                                                                                                                                                        |   |   |   |   |   |   |   |   |
| Patient Ethnicity                           | <input type="checkbox"/> Hispanic or Latino<br><input type="checkbox"/> Not Hispanic or Latino<br><input type="checkbox"/> Patient declined to provide<br><input type="checkbox"/> Unknown                                                                                                                                                                                                                                                                                                                                                                                                                                                       |   |   |   |   |   |   |   |   |
| Patient Insurance Type:                     | <input type="checkbox"/> Aetna<br><input type="checkbox"/> Blue Cross/Blue Shield<br><input type="checkbox"/> Cigna<br><input type="checkbox"/> Humana<br><input type="checkbox"/> United Healthcare<br><input type="checkbox"/> Wellpoint<br><input type="checkbox"/> Medicare Advantage<br><input type="checkbox"/> Medicare Fee for Service<br><input type="checkbox"/> Medicaid<br><input type="checkbox"/> Tricare<br><input type="checkbox"/> None<br><input type="checkbox"/> Other (list specific name of plan if not listed above): _____                                                                                               |   |   |   |   |   |   |   |   |

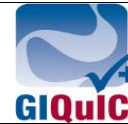

*Colonoscopy Data Collection Form*

**Endoscopy Suite Information**

|                               |                                                                                                                                                                                                                                        |                                                                                                                                     |                                                                                                                                                                 |
|-------------------------------|----------------------------------------------------------------------------------------------------------------------------------------------------------------------------------------------------------------------------------------|-------------------------------------------------------------------------------------------------------------------------------------|-----------------------------------------------------------------------------------------------------------------------------------------------------------------|
| <b>Endoscopy Facility ID:</b> | <input type="text"/> <input type="text"/> <input type="text"/> <input type="text"/>                                                                                                                                                    | Endo Suite Type: <input type="checkbox"/> Hospital<br><input type="checkbox"/> ASC/AEC<br><input type="checkbox"/> Physician Office |                                                                                                                                                                 |
| <b>Physician ID (NPI):</b>    | <input type="text"/> | Endo Suite Teaching Status:                                                                                                         | <input type="checkbox"/> Teaching Facility<br><input type="checkbox"/> Non-Teaching Facility                                                                    |
| Fellow Physician ID (NPI):    | <input type="text"/> | Did the Fellow Physician perform the procedure?                                                                                     | <input type="checkbox"/> Yes<br><input type="checkbox"/> No                                                                                                     |
| Year of Fellowship            | <input type="checkbox"/> Year 1<br><input type="checkbox"/> Year 2<br><input type="checkbox"/> Year 3<br><input type="checkbox"/> Year 4                                                                                               | Physician Specialty                                                                                                                 | <input type="checkbox"/> GI<br><input type="checkbox"/> IM<br><input type="checkbox"/> FP<br><input type="checkbox"/> Surgeon<br><input type="checkbox"/> Other |

**General Quality Indicators**

|                                                            |                                                                                                                                                                                                                                        |
|------------------------------------------------------------|----------------------------------------------------------------------------------------------------------------------------------------------------------------------------------------------------------------------------------------|
| <b>Procedure Date:</b>                                     | <input type="text"/> |
| <b>Endoscopy Procedure:</b>                                | <input type="checkbox"/> Colonoscopy <input type="checkbox"/> ERCP<br><input type="checkbox"/> EGD <input type="checkbox"/> EUS                                                                                                        |
| <b>Current History &amp; Physical Documented on Chart?</b> | <input type="checkbox"/> Yes <input type="checkbox"/> No                                                                                                                                                                               |
| <b>Informed Consent Documented in Medical Record?</b>      | <input type="checkbox"/> Yes <input type="checkbox"/> No                                                                                                                                                                               |
| <b>ASA Category:</b>                                       | <input type="checkbox"/> ASA I <input type="checkbox"/> ASA II <input type="checkbox"/> ASA III <input type="checkbox"/> ASA IV <input type="checkbox"/> ASA V <input type="checkbox"/> ASA-E                                          |
| Sedation type:                                             | <input type="checkbox"/> None <input type="checkbox"/> Moderate <input type="checkbox"/> Deep (propofol) <input type="checkbox"/> General                                                                                              |
| Sedation administered by:                                  | <input type="checkbox"/> Nurse <input type="checkbox"/> Endoscopist <input type="checkbox"/> Anesthesia professional                                                                                                                   |

**Discharge Instructions**

*Note: If the procedure is for an inpatient, please fill out only the questions on Diet Instructions and Medication Resumption. If the procedure is for an outpatient, please fill out all the instruction questions below.*

|                                                                                    |                                                          |
|------------------------------------------------------------------------------------|----------------------------------------------------------|
| <b>Written <u>Discharge Instructions</u> provided to patient before discharge?</b> | <input type="checkbox"/> Yes <input type="checkbox"/> No |
| Diet Instructions:                                                                 | <input type="checkbox"/> Yes <input type="checkbox"/> No |

GI Quality Improvement Consortium

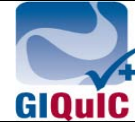

*Colonoscopy Data Collection Form*

|                                                                                                              |                                                                                       |
|--------------------------------------------------------------------------------------------------------------|---------------------------------------------------------------------------------------|
| Medication Resumption / Orders Given:                                                                        | <input type="checkbox"/> Yes <input type="checkbox"/> No <input type="checkbox"/> N/A |
| Return to Activities:                                                                                        | <input type="checkbox"/> Yes <input type="checkbox"/> No                              |
| Potential Delayed Complications:                                                                             | <input type="checkbox"/> Yes <input type="checkbox"/> No                              |
| Medical Emergency Contact Number:                                                                            | <input type="checkbox"/> Yes <input type="checkbox"/> No                              |
| <b>Anticoagulation / Anti-platelet Therapy</b>                                                               |                                                                                       |
| <b>Anticoagulation / Anti-platelet Therapy: Patient given instructions relative to resumption of therapy</b> | <input type="checkbox"/> Yes <input type="checkbox"/> No <input type="checkbox"/> N/A |

**Colonoscopy Procedure Quality Indicators**

|                                                                                                                                                                                               |                                                                                                                                                                                                                                                                                                                                                                                                                                    |   |   |   |
|-----------------------------------------------------------------------------------------------------------------------------------------------------------------------------------------------|------------------------------------------------------------------------------------------------------------------------------------------------------------------------------------------------------------------------------------------------------------------------------------------------------------------------------------------------------------------------------------------------------------------------------------|---|---|---|
| <b>Colonoscopy Type:</b>                                                                                                                                                                      | <input type="checkbox"/> Colon Cancer Screening <input type="checkbox"/> Surveillance <input type="checkbox"/> Diagnostic                                                                                                                                                                                                                                                                                                          |   |   |   |
|                                                                                                                                                                                               | If Screening or Surveillance, Year of <i>previous colonoscopy</i> : <table border="1" style="display: inline-table; vertical-align: middle;"><tr><td style="width: 20px; height: 20px; text-align: center;">y</td><td style="width: 20px; height: 20px; text-align: center;">y</td><td style="width: 20px; height: 20px; text-align: center;">y</td><td style="width: 20px; height: 20px; text-align: center;">y</td></tr></table> | y | y | y |
| y                                                                                                                                                                                             | y                                                                                                                                                                                                                                                                                                                                                                                                                                  | y | y |   |
| <b>Bowel Prep Quality:</b><br><i>(Bowel Prep is adequate if sufficient to accurately detect polyps ≥ 6 mm in size; Inadequate if it is NOT sufficient to accurately detect polyps ≥ 6 mm)</i> | <input type="checkbox"/> Adequate <input type="checkbox"/> Inadequate                                                                                                                                                                                                                                                                                                                                                              |   |   |   |

**Colonoscopy Indication – Select at least one (1) reason for performing the colonoscopy**

|                          |                                                                                                                                                                                     |
|--------------------------|-------------------------------------------------------------------------------------------------------------------------------------------------------------------------------------|
| <input type="checkbox"/> | Evaluation of unexplained GI bleeding                                                                                                                                               |
| <input type="checkbox"/> | Unexplained iron deficiency anemia                                                                                                                                                  |
| <input type="checkbox"/> | Screening for colonic neoplasia                                                                                                                                                     |
| <input type="checkbox"/> | Surveillance due to prior colonic neoplasia                                                                                                                                         |
| <input type="checkbox"/> | Inflammatory bowel disease of the intestine if more precise diagnosis or determination of the extent / severity of activity of disease will influence immediate / future management |
| <input type="checkbox"/> | Clinically significant diarrhea of unexplained origin                                                                                                                               |
| <input type="checkbox"/> | Evaluation of barium enema or other imaging study of an abnormality that is likely to be clinically significant, such as filling defect or stricture                                |
| <input type="checkbox"/> | Intraoperative identification of a lesion not apparent/found at surgery (e.g. polypectomy site or bleeding source)                                                                  |

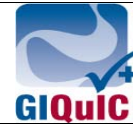

*Colonoscopy Data Collection Form*

|                                                                   |                                                                                                                                                                                                                                        |
|-------------------------------------------------------------------|----------------------------------------------------------------------------------------------------------------------------------------------------------------------------------------------------------------------------------------|
| <input type="checkbox"/>                                          | Treatment of bleeding from such lesions as vascular malformation, ulceration, neoplasia, & polypectomy site                                                                                                                            |
| <input type="checkbox"/>                                          | Foreign body removal                                                                                                                                                                                                                   |
| <input type="checkbox"/>                                          | Excision of colonic polyp                                                                                                                                                                                                              |
| <input type="checkbox"/>                                          | Decompression of an acute nontoxic megacolon or sigmoid volvulus                                                                                                                                                                       |
| <input type="checkbox"/>                                          | Balloon dilation of stenotic lesions                                                                                                                                                                                                   |
| <input type="checkbox"/>                                          | Palliative treatment of stenosing or bleeding neoplasms                                                                                                                                                                                |
| <input type="checkbox"/>                                          | Marking a neoplasm for localization                                                                                                                                                                                                    |
| <input type="checkbox"/>                                          | Other , specify: _____                                                                                                                                                                                                                 |
| <b>Cecal Landmarks – Documentation provided in medical record</b> |                                                                                                                                                                                                                                        |
| <b>Ileocecal Valve Photographed</b>                               | <input type="checkbox"/> Yes <input type="checkbox"/> No                                                                                                                                                                               |
| <b>Appendiceal Orifice Photographed</b>                           | <input type="checkbox"/> Yes <input type="checkbox"/> No                                                                                                                                                                               |
| <b>Terminal Ileum Photographed</b>                                | <input type="checkbox"/> Yes <input type="checkbox"/> No                                                                                                                                                                               |
| <b>Colorectal Neoplasm Risk Assessment</b>                        |                                                                                                                                                                                                                                        |
| <b>Colorectal Neoplasm Risk Assessment for this procedure:</b>    | <input type="checkbox"/> Average Risk<br><input type="checkbox"/> High Risk<br><input type="checkbox"/> N/A                                                                                                                            |
| If High Risk, select all that apply:                              |                                                                                                                                                                                                                                        |
|                                                                   | Colon or Rectal Adenocarcinoma, specify(c):<br><input type="checkbox"/> Personal History <input type="checkbox"/> Family History (1 <sup>st</sup> degree relative < 60 years old) <input type="checkbox"/> Both                        |
|                                                                   | History of Colon Adenoma, specify (c):<br><input type="checkbox"/> Personal History <input type="checkbox"/> Family History (1 <sup>st</sup> degree relative < 60 years old with advanced adenoma(s))<br><input type="checkbox"/> Both |
|                                                                   | High Risk Genetic Family Cancer Syndrome (e.g. Familial Adenomatous Polyposis Syndrome, HNPCC/Lynch Syndrome,) (c)<br><input type="checkbox"/> Personal History <input type="checkbox"/> Family History <input type="checkbox"/> Both  |
| <input type="checkbox"/>                                          | Advanced Neoplasm (≥ 10 mm, high grade dysplasia, villous component) (c)                                                                                                                                                               |



*Colonoscopy Data Collection Form*

|                                                               |                                                                                                                                                                                                                                                                                                                                                                                                                                                                                                                                                                                             |
|---------------------------------------------------------------|---------------------------------------------------------------------------------------------------------------------------------------------------------------------------------------------------------------------------------------------------------------------------------------------------------------------------------------------------------------------------------------------------------------------------------------------------------------------------------------------------------------------------------------------------------------------------------------------|
| <input type="checkbox"/>                                      | 3 or More Adenomas (c)                                                                                                                                                                                                                                                                                                                                                                                                                                                                                                                                                                      |
| <input type="checkbox"/>                                      | Non Advanced Neoplasm (< 3 adenomas, < 10 mm, no villous component) (c)                                                                                                                                                                                                                                                                                                                                                                                                                                                                                                                     |
|                                                               | Sessile serrated polyp(s) < 10 mm with no dysplasia (c)<br><input type="checkbox"/> Personal History <input type="checkbox"/> Family History (1 <sup>st</sup> degree relative < 60 years old) <input type="checkbox"/> Both                                                                                                                                                                                                                                                                                                                                                                 |
|                                                               | Sessile serrated polyp ≥ 10 mm OR sessile serrated polyp with dysplasia OR traditional serrated adenoma (c)<br><input type="checkbox"/> Personal History <input type="checkbox"/> Family History (1 <sup>st</sup> degree relative < 60 years old) <input type="checkbox"/> Both                                                                                                                                                                                                                                                                                                             |
|                                                               | Serrated polyposis syndrome* (c)<br><input type="checkbox"/> Personal History <input type="checkbox"/> Family History (1 <sup>st</sup> degree relative < 60 years old) <input type="checkbox"/> Both<br><small>*Based on the World Health Organization definition of serrated polyposis syndrome, with one of the following criteria: (1) at least 5 serrated polyps proximal to sigmoid, with 2 or more ≥ 10 mm; (2) any serrated polyps proximal to sigmoid with family history of serrated polyposis syndrome; and (3) &gt; 20 serrated polyps of any size throughout the colon.</small> |
| <input type="checkbox"/>                                      | Inflammatory Bowel Disease (≥ 8 years pancolitis or ≥ 15 years left sided colitis) (c)                                                                                                                                                                                                                                                                                                                                                                                                                                                                                                      |
| <input type="checkbox"/>                                      | Inflammatory Bowel Disease with Known Dysplasia                                                                                                                                                                                                                                                                                                                                                                                                                                                                                                                                             |
| <b>Polyps</b>                                                 |                                                                                                                                                                                                                                                                                                                                                                                                                                                                                                                                                                                             |
| Number of Polyps Removed During Colonoscopy Procedure:        | <input style="width: 100%;" type="text"/>                                                                                                                                                                                                                                                                                                                                                                                                                                                                                                                                                   |
| Number Polyps Partially Removed During Colonoscopy Procedure: | <input style="width: 100%;" type="text"/>                                                                                                                                                                                                                                                                                                                                                                                                                                                                                                                                                   |
| Number Polyps Retrieved During Colonoscopy Procedure:         | <input style="width: 100%;" type="text"/>                                                                                                                                                                                                                                                                                                                                                                                                                                                                                                                                                   |
| Polyp Morphology Described:                                   | <input type="checkbox"/> Yes <input type="checkbox"/> No <input type="checkbox"/> N/A                                                                                                                                                                                                                                                                                                                                                                                                                                                                                                       |
| Polyp Size Described:                                         | <input type="checkbox"/> Yes <input type="checkbox"/> No <input type="checkbox"/> N/A                                                                                                                                                                                                                                                                                                                                                                                                                                                                                                       |



*Colonoscopy Data Collection Form*

**Patient Sociodemographic Information**

**Patient Identifier:**

**Patient Type:**

- Inpatient
- Outpatient

**Patient Zip Code:**

|  |  |  |  |  |  |
|--|--|--|--|--|--|
|  |  |  |  |  |  |
|--|--|--|--|--|--|

**Patient Birth Date:**

|   |   |   |   |   |   |   |   |
|---|---|---|---|---|---|---|---|
| m | m | d | d | y | y | y | y |
|---|---|---|---|---|---|---|---|

**Patient Gender:**

- Male
- Female

Patient Height:  
(inches)

|  |  |
|--|--|
|  |  |
|--|--|

Patient Weight:  
(pounds)

|  |  |  |  |
|--|--|--|--|
|  |  |  |  |
|--|--|--|--|

**Patient Race:**

- American Indian (Native American) or Alaska Native
- Asian
- Black or African American
- Native Hawaiian or Other Pacific Islander
- White
- Patient declined to provide
- Unknown
- Other

Patient Ethnicity

- Hispanic or Latino
- Not Hispanic or Latino
- Patient declined to provide
- Unknown

Patient Insurance Type:

- Aetna
- Blue Cross/Blue Shield
- Cigna
- Humana
- United Healthcare
- Wellpoint
- Medicare Advantage
- Medicare Fee for Service
- Medicaid
- Tricare
- None
- Other (list specific name of plan if not listed above):

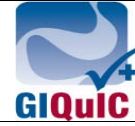

*Colonoscopy Data Collection Form*

| <b>Adverse Events</b><br>Please specify immediate adverse events(s) occurring the same day, before the patient leaves the endoscopy facility |                                                         |
|----------------------------------------------------------------------------------------------------------------------------------------------|---------------------------------------------------------|
| <input type="checkbox"/>                                                                                                                     | No Adverse Events                                       |
| <input type="checkbox"/>                                                                                                                     | Bowel Perforation                                       |
| <input type="checkbox"/>                                                                                                                     | Bleeding (Unplanned Intervention or Hospital Admission) |
| <input type="checkbox"/>                                                                                                                     | Emergency Dept visit related to colonoscopy procedure   |
| <input type="checkbox"/>                                                                                                                     | Hospital Admission related to colonoscopy procedure     |
| <input type="checkbox"/>                                                                                                                     | Sedation Related (Unplanned Intervention)               |
| <input type="checkbox"/>                                                                                                                     | Death                                                   |
| <input type="checkbox"/>                                                                                                                     | Other, specify: _____                                   |
